# Supplementary material for: Three-input–three-output logic operations based on absorption and fluorescence dual-mode from a thiourea compound
Source: Royal Society of Chemistry journal article supplement (doi:10.1039/c2dt31808c), 2012-10-03
Supplement: c2dt31808c.pdf [file c2dt31808c.pdf]

## Electronic Supplementary Information

### **Three-Input-Three-Output Logic Operations based on Absorption and Fluorescence Dual-mode from a Thiourea Compound**

*Lianlian Wang,<sup>a,b</sup> Bin Li,<sup>\*a</sup> Liming Zhang<sup>a</sup> and Yongshi Luo<sup>a</sup>*

<sup>a</sup>State Key Laboratory of Luminescence and Applications, Changchun  
Institute of Optics Fine Mechanics and Physics, Chinese Academy of  
Sciences, Changchun 130033, P. R. China

<sup>b</sup>Graduate School of the Chinese Academy of Sciences, Chinese Academy  
of Sciences, Beijing 100039, P. R. China

---

\*Corresponding author. Tel./fax: +86431 86176935.  
E-mail address: lib020@yahoo.cn (B. Li)

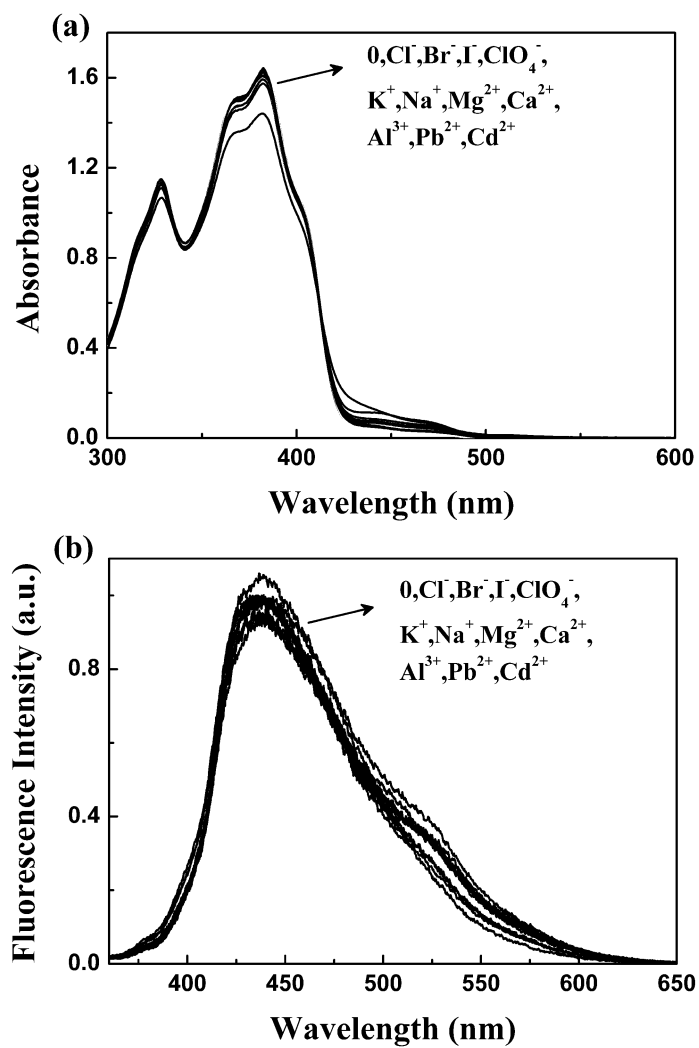

Fig. S1 Absorption (a) and normalized fluorescence (b,  $\lambda_{\text{ex}}=342$  nm) response of receptor **1** in the presence of various interference ions (1 mM).

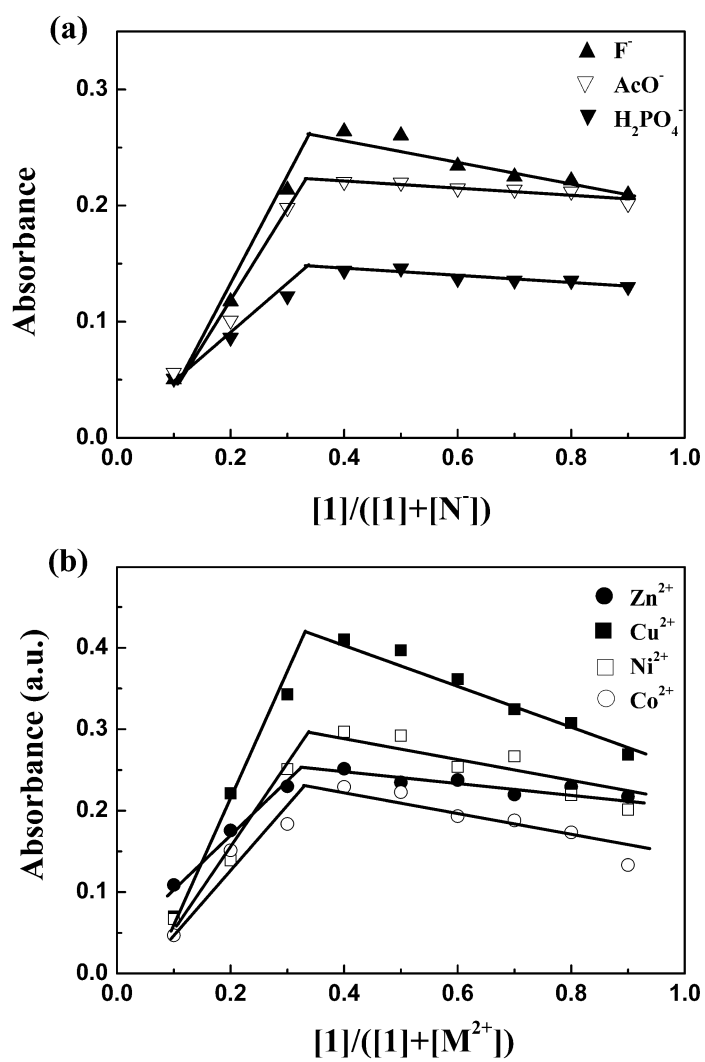

Fig. S2 The job's plots for determining the stoichiometry of receptor **1** with anions (a) and cations (b). The total concentration of receptor **1** and ions was  $50 \mu M$ .

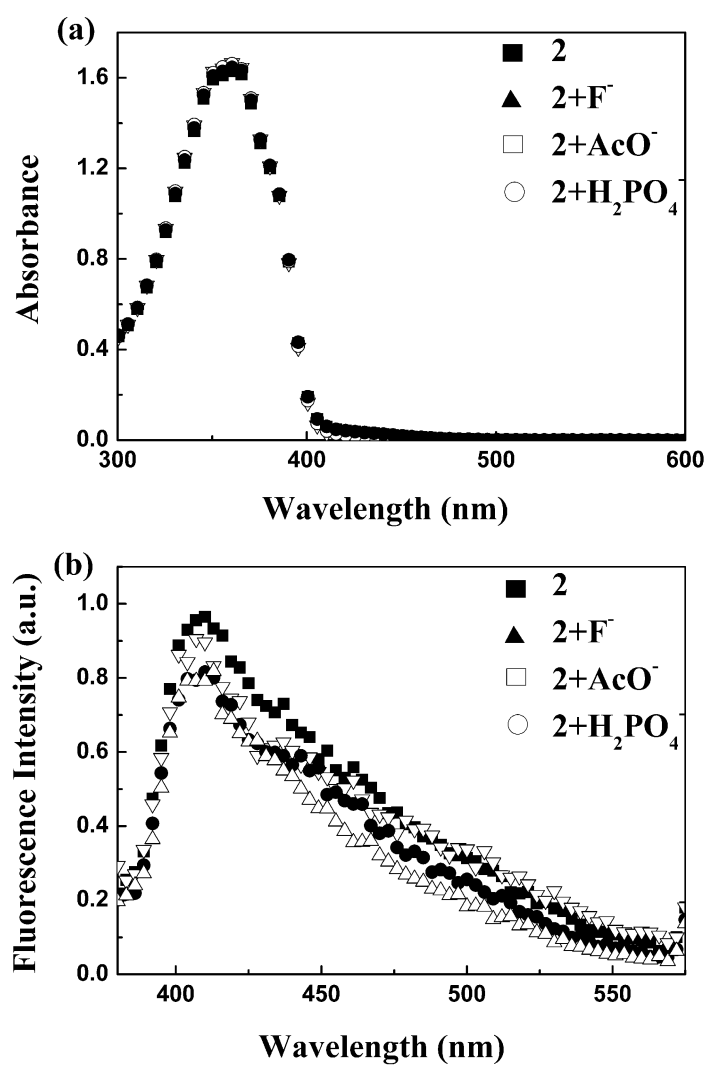

Fig. S3 Absorption (a) and normalized fluorescence (b,  $\lambda_{\text{ex}}=271$  nm) spectra of receptor **2** ( $50 \mu\text{M}$ ) in the presence of anions (5 equiv) in DMSO/H<sub>2</sub>O solution (V:V = 9:1).

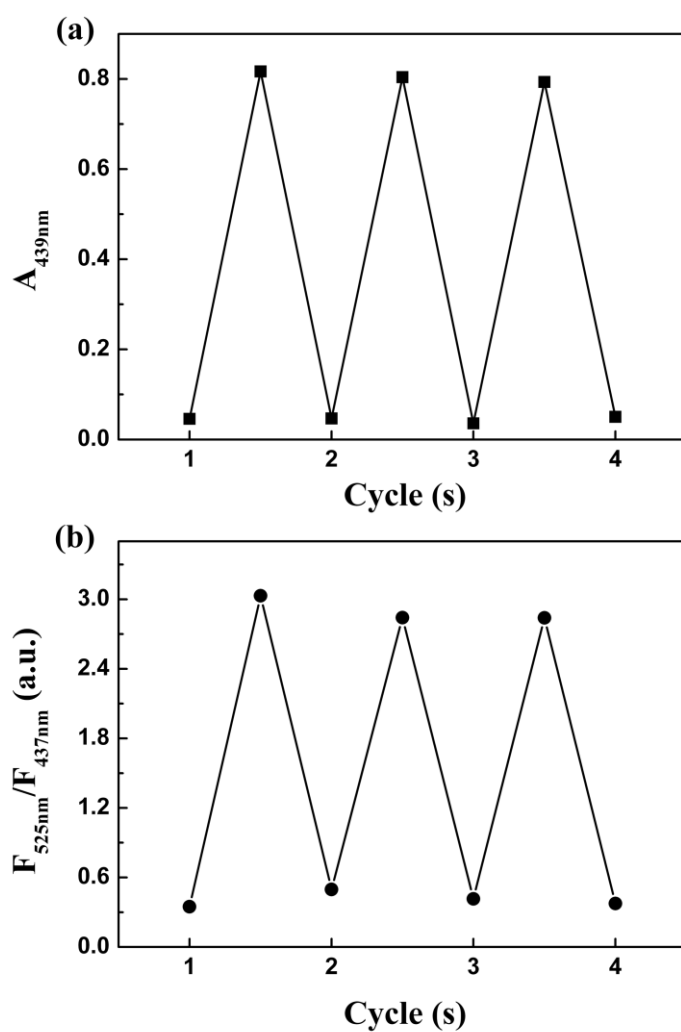

Fig. S4 Reversible absorbance (a) and fluorescence (b) titration responses of receptor **1** ( $50 \mu\text{M}$ ) bonding to  $\text{F}^-$  (5 equiv) by the introduction of  $\text{Ca}^{2+}$  (5 equiv) to the system. The cyclic index is the number of alternating cycles.

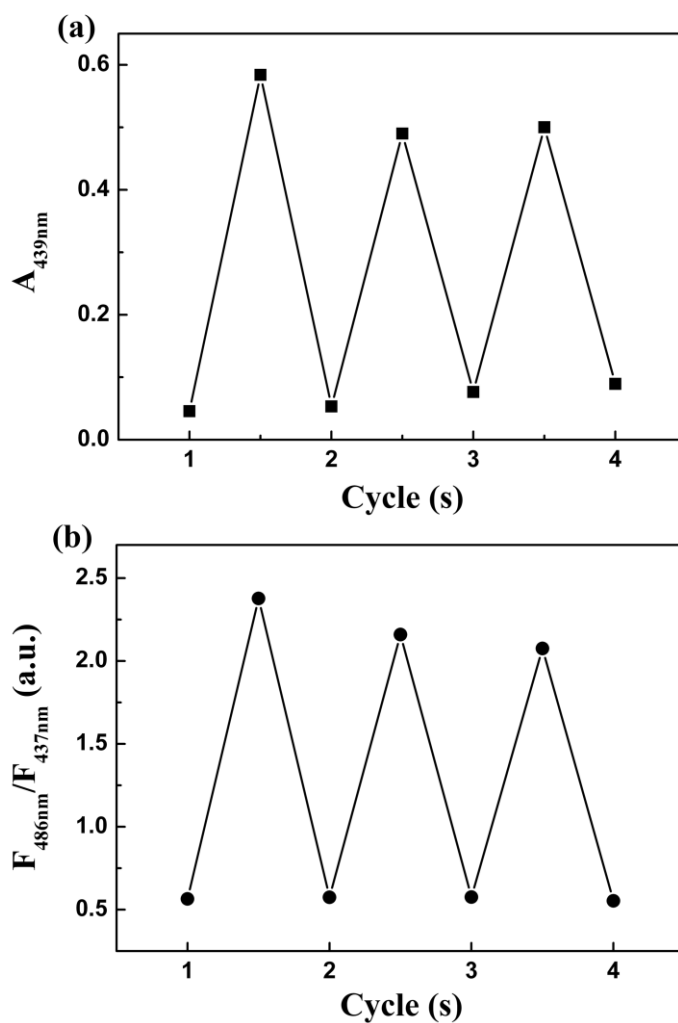

Fig. S5 Reversible absorbance (a) and fluorescence (b) titration responses of receptor **1** ( $50 \mu\text{M}$ ) bonding to  $\text{Zn}^{2+}$  (5 equiv) by the introduction of EDTA (sodium salt, 10 equiv) to the system. The cyclic index is the number of alternating cycles.

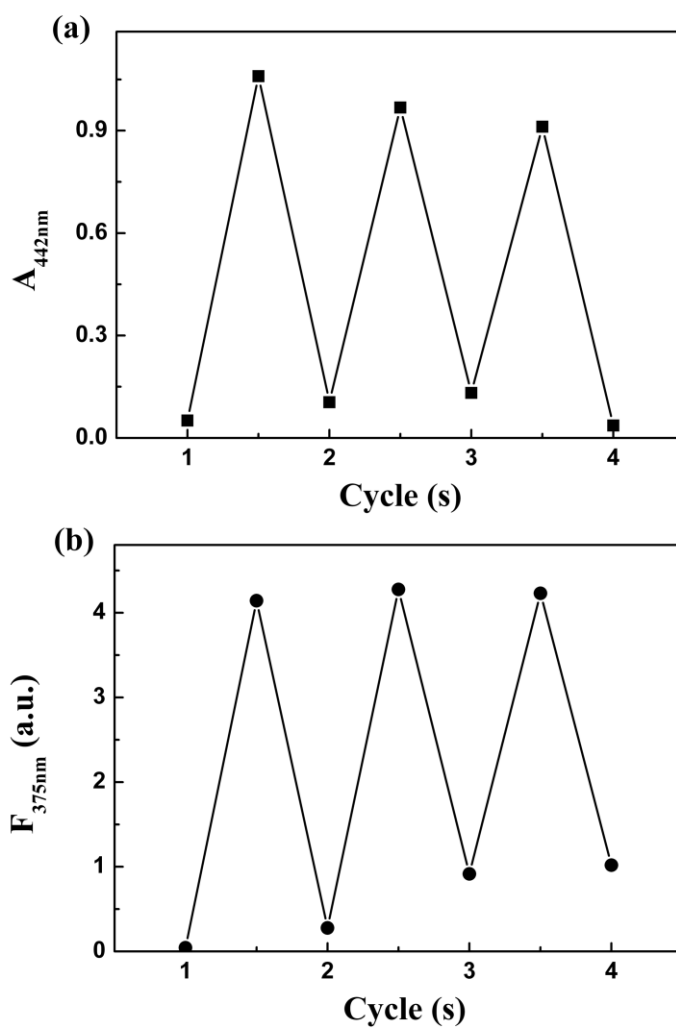

Fig. S6 Reversible absorbance (a) and fluorescence (b) titration responses of receptor **1** ( $50 \mu\text{M}$ ) bonding to  $\text{Cu}^{2+}$  (5 equiv) by the introduction of EDTA (sodium salt, 20 equiv) to the system. The cyclic index is the number of alternating cycles.

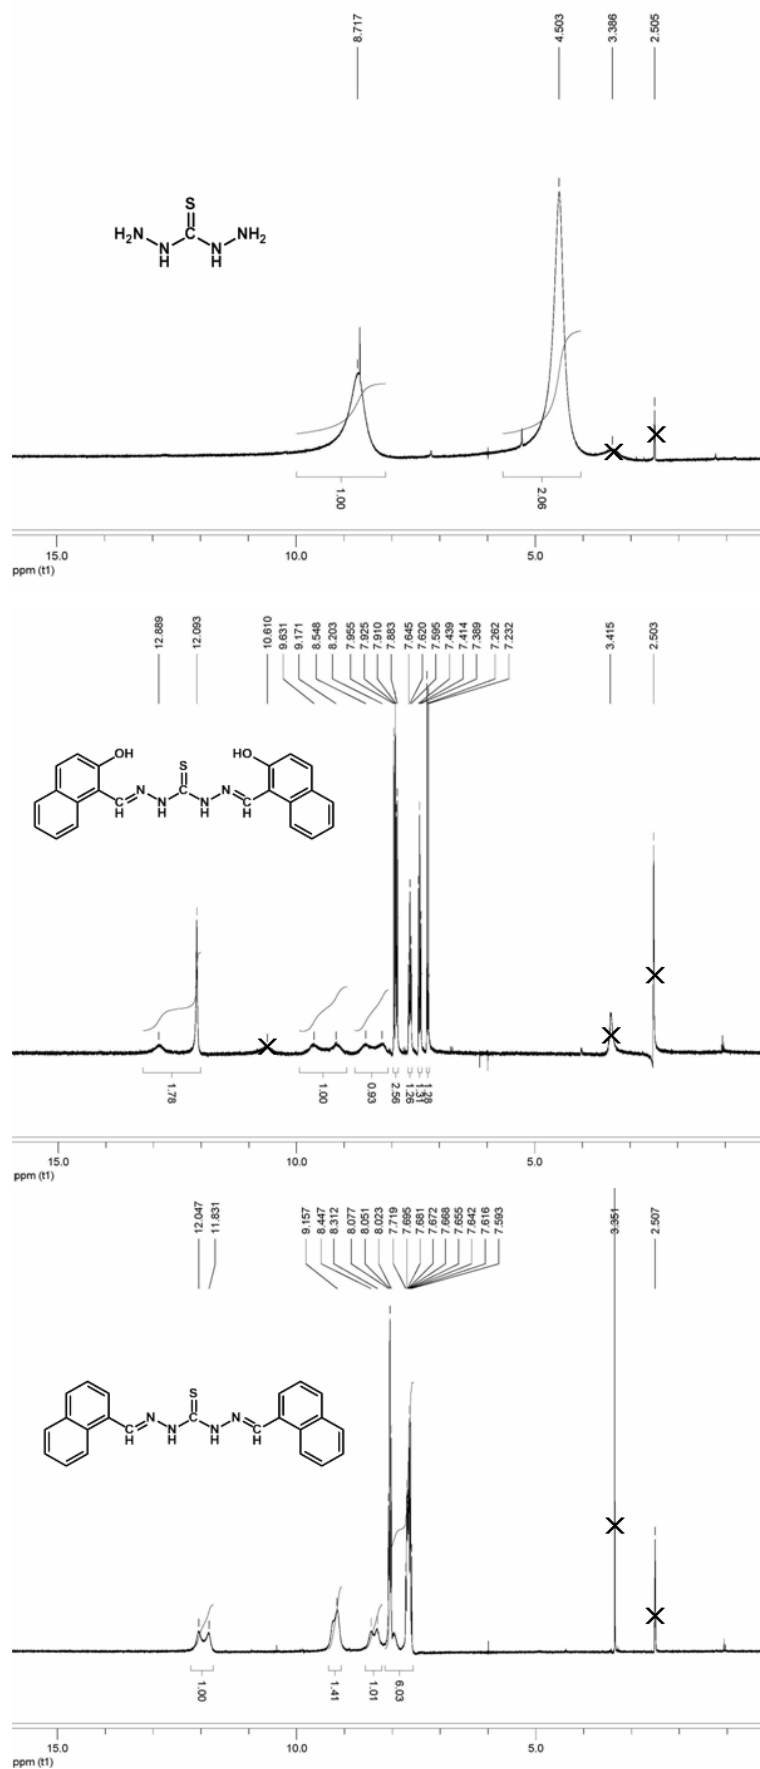

Fig. S7 <sup>1</sup>H NMR spectra of thiocarbohydride, receptor **1** and **2**.
